# Supplementary material
Source: PubMed Central journal article supplement (PMC5029548)
Supplement: NIHMS69809-supplement-Supplemental_Information.pdf [file NIHMS69809-supplement-Supplemental_Information.pdf]

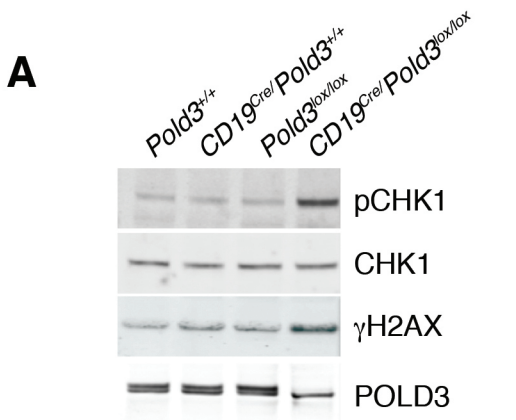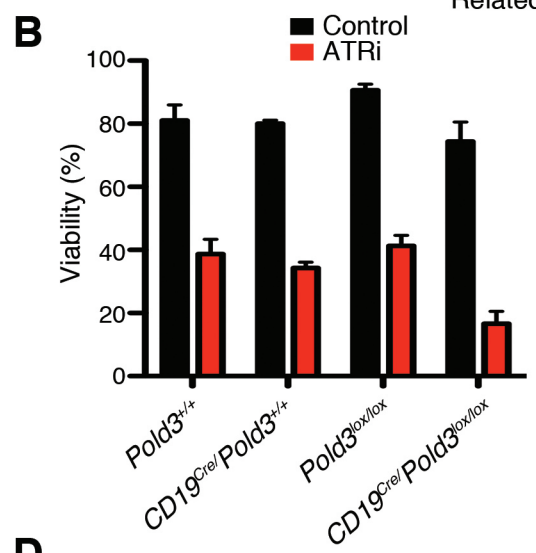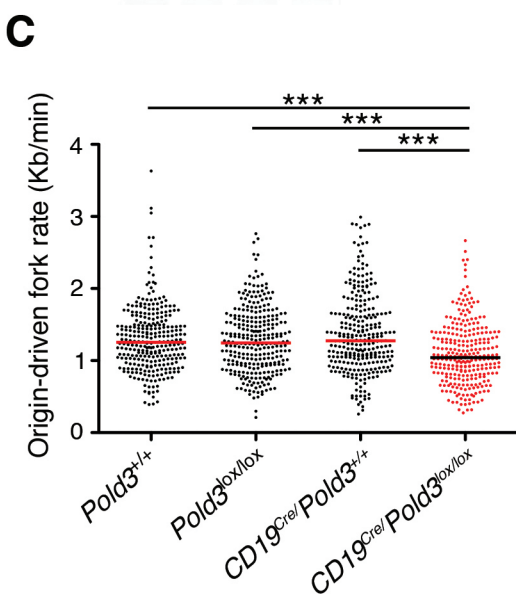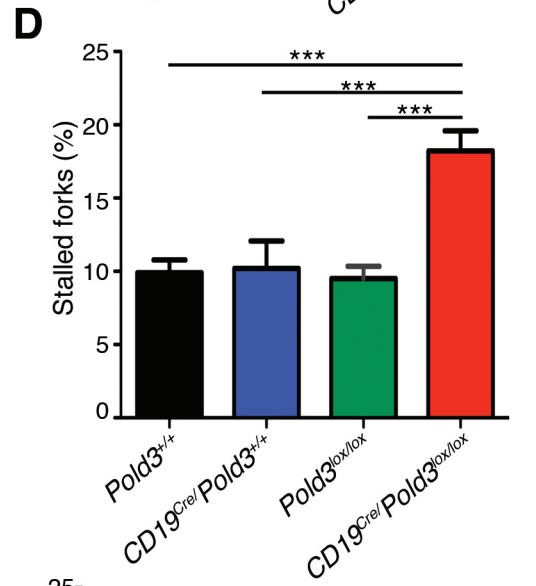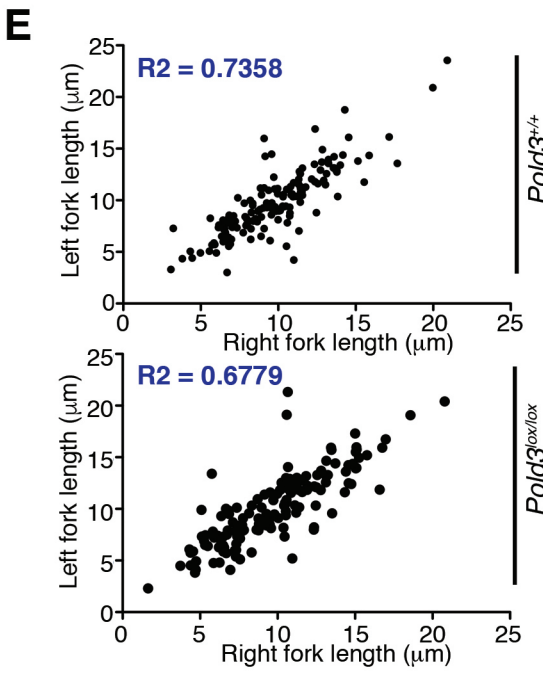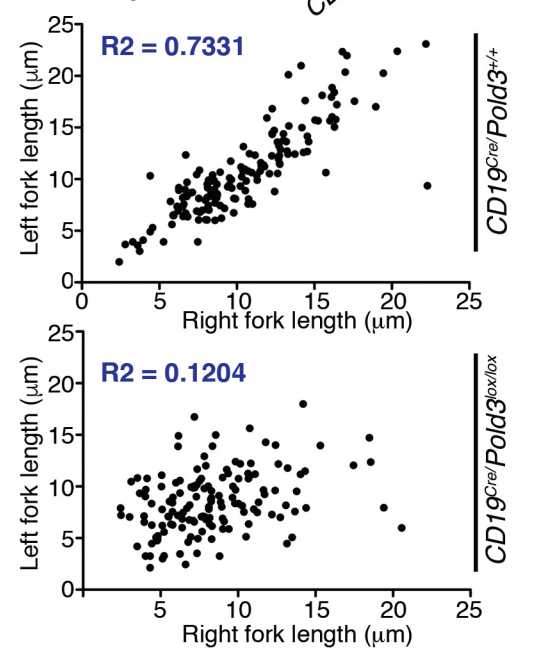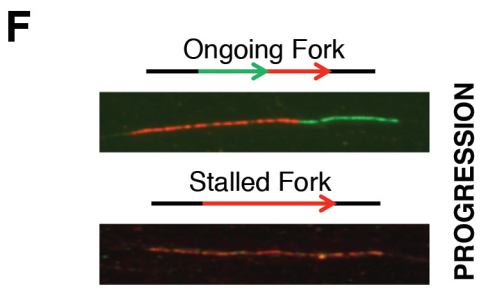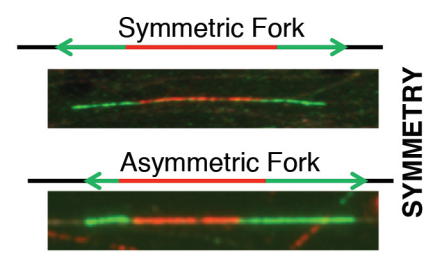

**Figure S1** (related to [Fig. 3](#)). (A) WB illustrating the levels of phosphorylated CHK1 (S345), total CHK1,  $\gamma$ H2AX and POLD3 in B cells from the indicated genotypes, 48 hrs after stimulation with LPS (25  $\mu$ g/ml). (B) Percentage of viable cells (measured by FACS) in B cell cultures of the indicated genotypes, 48 hrs after stimulation with LPS (25  $\mu$ g/ml) in the presence or absence of a previously described ATR inhibitor (Toledo et al. 2011) for the last 24 hrs (5  $\mu$ M). Data are represented as mean  $\pm$  SD (n=3). (C) Fork rates were measured in stretched DNA fibers prepared from B cells of the indicated genotypes. The data used for the analysis are the same ones shown in Figure 3E, but restricting the analysis to forks are derived from active replication origins (“green-red-green” tracks or two proximal “red-green” forks moving in opposite directions in the same fiber). 296 (*Pold3*<sup>+/+</sup>), 292 (*Pold3*<sup>lox/lox</sup>), 288 (CD19<sup>Cre</sup>/*Pold3*<sup>+/+</sup>) and 288 (CD19<sup>Cre</sup>/*Pold3*<sup>lox/lox</sup>) tracks were used for the analysis in each case. \*\*\**P*<0.001. (D) Percentage of stalled replication forks found by DNA fiber analyses (see Methods) from fibers prepared from B cell cultures of the indicated genotypes. Data are represented as mean  $\pm$  SD (n=3). \*\*\**P*<0.001. (E) Fork asymmetry (represented as left vs right fork lengths) in DNA fibers prepared from B cells of the indicated genotypes. The determination coefficient is indicated in blue (R<sup>2</sup>). (F) Examples of the types of figures that are encountered during the analyses of DNA fibers.

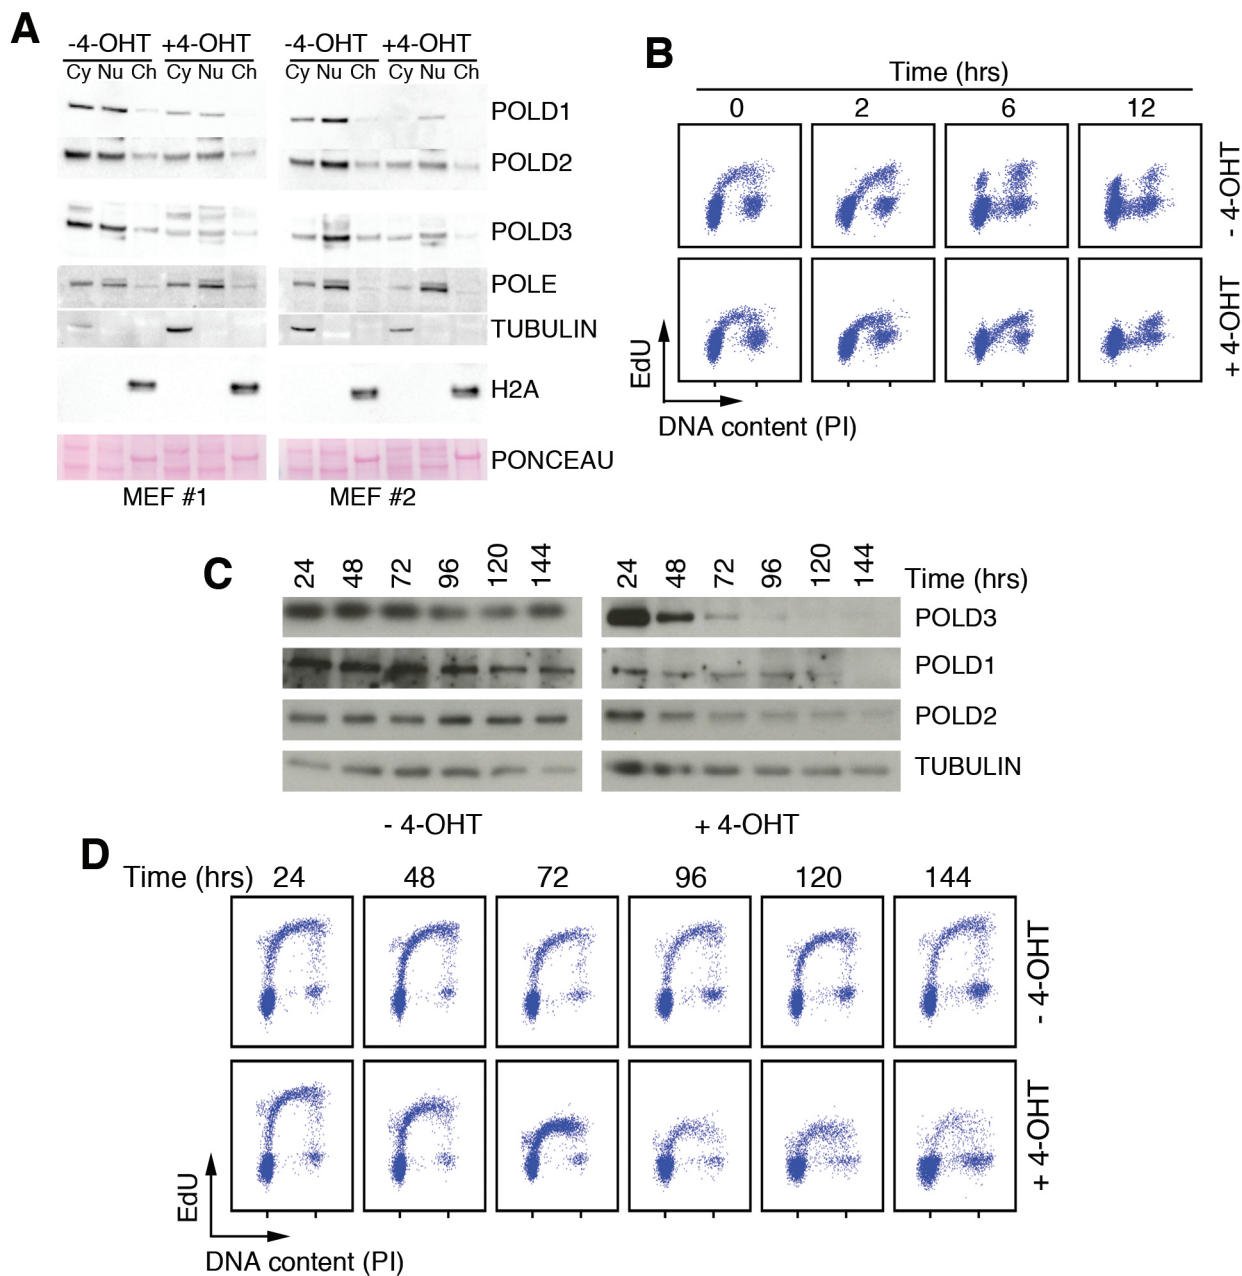

**Figure S2** (related to [Fig. 4](#)). (A) WB illustrating the levels of POLD1, POLD2, POLD3 and POLE in cytoplasmic (Cy), nuclear (Nu) and chromatin (Ch) fractions from two independent Ub<sup>Cre</sup>/*Pold3*<sup>lox/lox</sup> MEF exposed (or not) to 4-OHT (1 μM) for 72 hrs. TUBULIN and H2A are shown as controls for the fractionation, and the Ponceau image of the membrane to illustrate the overall protein levels in each fraction. (B) Ub<sup>Cre</sup>/*Pold3*<sup>lox/lox</sup> MEFs were treated with 4-OHT or not treated and two days later pulsed-labeled for 1h with 10 μM EdU. After washing off the EdU, cells were allowed to proceed through S phase for the indicated time periods (0, 2, 6 or 12h) and analyzed by FACS. Note that while untreated MEF were able to progress through S-phase and enter the next G1 by 6 hrs, *Pold3*-deleted cells failed to do so even at 12 hrs after the EdU pulse. (C) WB illustrating the levels of POLD1, POLD2 and POLD3 in Ub<sup>Cre</sup>/*Pold3*<sup>lox/lox</sup> MEF exposed (or not) to 4-OHT for the indicated times. TUBULIN levels are shown as loading control. (D) DNA replication was analysed by monitoring the amount of EdU incorporation (10 μM, 1hr) by FACS in Ub<sup>Cre</sup>/*Pold3*<sup>lox/lox</sup> MEF treated as in (C) for up to 7 days. Note the progressive decrease in EdU incorporation rates which correlates with the decrease in POLD1-3 levels shown in (C).

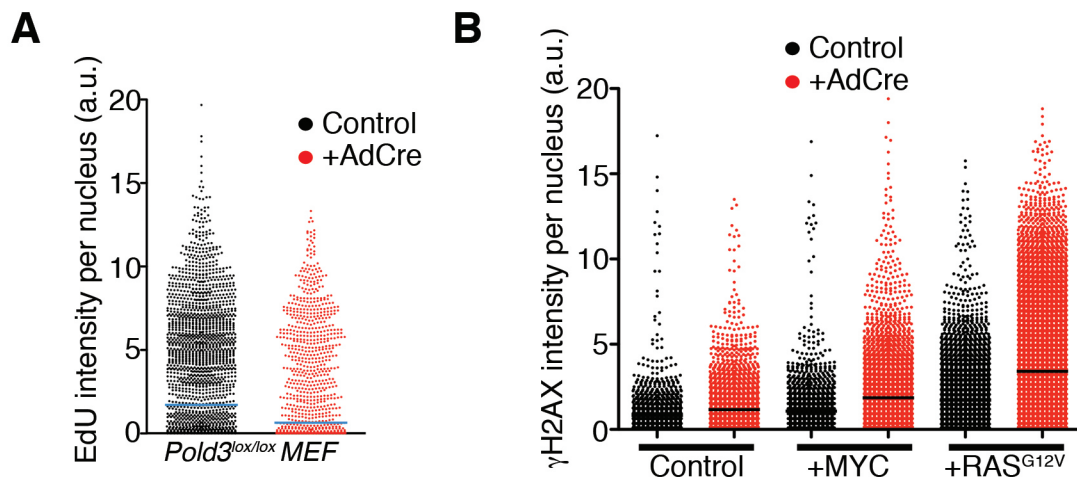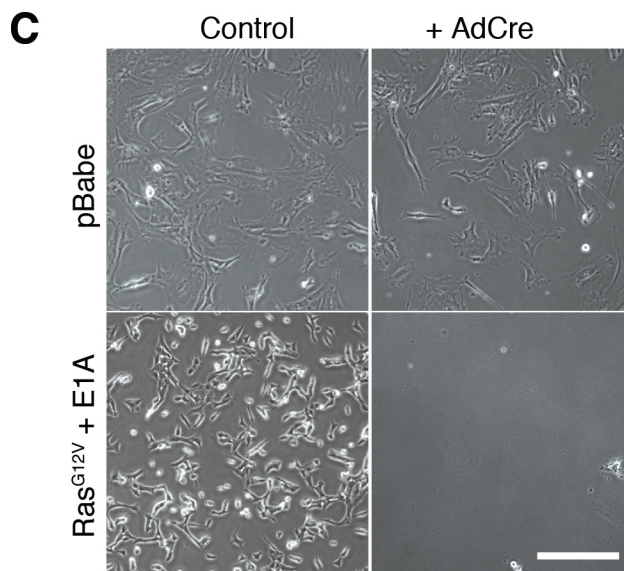

**Figure S3** (related to **Fig. 4**). (A) DNA replication rates from *Pold3*<sup>lox/lox</sup> MEF infected with AdCre (or mock infected), as measured by HTM quantifying the levels of EdU incorporation per individual nucleus. EdU was added at 10  $\mu$ M for 30 min. (B) The impact of POLD3 deficiency in oncogene-induced DNA damage was evaluated by infecting *Pold3*<sup>lox/lox</sup> MEF with retroviruses expressing MYC or RAS<sup>G12V</sup> and E1A oncogenes (or with a control retroviral vector, pBabe). 48 hrs after infection with oncogene-expressing viruses, cells were exposed to AdCre for another 24 hrs, after which the levels of  $\gamma$ H2AX per individual nucleus were analyzed by HTM. (C) Representative pictures from the experiment quantified in (B). Images were taken 48 hrs after infection with AdCre.

## SUPPLEMENTAL TABLES

**Table S1, related to Fig 4.** Proteomic analyses of POLD3 immunoprecipitation from WT and POLD3-deficient B cells.

## SUPPLEMENTAL EXPERIMENTAL PROCEDURES

### Animal research

The linearized *Pold3*<sup>GT:lox</sup> vector (EUCOMM) was used for the electroporation of mouse ES cells. Recombinant ES cells were screened by Southern Blot through standard procedures, and subsequently used for the generation of chimaeras by aggregation. *Pold3* mutant strains were genotyped by PCR (primers available upon request). CD19<sup>Cre</sup>, Ub<sup>Cre</sup>, EIIA-Cre and actin-FLP strains have been described before (Lakso et al. 1996; Rickert et al. 1997; Rodriguez et al. 2000; Ruzankina et al. 2007). Mice were kept under standard conditions at specific-pathogen free facility of the Spanish National Cancer Centre in a mixed C57BL/6-129/Sv background. All mouse work was performed in accordance with the Guidelines for Humane Endpoints for Animals Used in Biomedical Research, and under the supervision of the Ethics Committee for Animal Research of the “Instituto de Salud Carlos III”.

### Immunohistochemistry

Tissues were fixed in formalin and embedded in paraffin for subsequent processing. Consecutive 2.5- $\mu$ m sections were treated with citrate for antigenic recovery and processed for immunohistochemistry with an antibody against  $\gamma$ H2AX (Millipore, 05-636). IHCs were scanned and digitalized with a MIRAX system (Zeiss) for further analysis.

### Cell culture

MEF from E13.5 d.p.c. embryos were generated by standard methods and grown in Dulbecco's Minimum Essential Media (DMEM, Invitrogen) supplemented with 15% FBS (Lonza). For all experiments, MEF were used at a low passage (<3) and grown in 5% oxygen to minimize exposure to reactive oxygen species. For B cell cultures, resting splenic B cells were isolated with anti-CD43 microbeads (anti-Ly48; Miltenyi Biotech) and cultured in the presence of LPS (25  $\mu$ g/ml; Sigma). For the analysis of chromosomal rearrangements, colcemide (Sigma) was added at 0.1  $\mu$ g/ml for the last 5 hrs and metaphases prepared using a standard hypotonic/Carnoy procedure followed by Giemsa staining.

### High Throughput Microscopy

MEF were grown on  $\mu$ CLEAR bottom 96-well plates (Greiner Bio-One). Immunofluorescence was performed using standard procedures with an antibody against  $\gamma$ H2AX (Millipore). Analysis of DNA Replication by EdU incorporation was done using click-it (Invitrogen) following manufacturers instructions. In all cases, images were automatically acquired from each well using an Opera High-Content Screening System (Perkin Elmer). A 20x magnification lens was used and images were taken at non-saturating conditions. Images were segmented using the DAPI signal to generate masks matching cell nuclei from which the mean signals for the rest of the stainings ( $\gamma$ H2AX or EdU) were calculated. Data were represented with the use of the Prism software (GraphPad Software).

## **Immunoblotting**

For protein extracts, cells were washed once with PBS, and lysed in RIPA buffer (Tris-HCl 50 mM, pH 7.4, NP-40 1%, Na-deoxycholate 0.25%, NaCl: 150 mM, EDTA 1 mM) containing protease and phosphatase inhibitors (Sigma). Samples were resolved by SDS-PAGE and analyzed by standard Western blotting techniques. Antibodies against CHK1 (Novocastra, NCL-Chk1), Chk1-S345P (Cell Signaling, 2348S), H2A (Cell Signaling, #3636),  $\gamma$ H2AX (Millipore, 05-636), CDK2 (Santa Cruz, M2, sc-163), POLD1 (Santa Cruz, sc373731), POLD2 (Sigma, HPA026745), POLD3 (Sigma, HPA039627), POLE (GeneTex, GTX113806), TUBULIN (Sigma, T9026) and  $\beta$ -ACTIN (Sigma, A5441) were used. Protein blot analyses were performed on the LICOR platform (Biosciences).

## **DNA fiber analyses**

Exponentially growing cells were pulse-labeled with 50  $\mu$ M CldU (20 min) followed by 250  $\mu$ M IdU (20 min). Labeled cells were collected and DNA fibers were spread in buffer containing 0.5% SDS, 200 mM Tris pH 7.4 and 50 mM EDTA. For immunodetection of labeled tracks, fibers were incubated with primary antibodies (for CldU, rat anti-BrdU (Abcam, ab6326); for IdU, mouse anti-BrdU (BD Biosciences, 347580)) and developed with the corresponding secondary antibodies conjugated to Alexa dyes. Mouse anti-ssDNA antibody (Millipore, MAB3034) was used to assess fiber integrity. Slides were examined with a Leica DM6000 B microscope, as described previously (Mouron et al. 2013). The conversion factor used was 1  $\mu$ m = 2.59 kb (Jackson and Pombo 1998). When indicated, analysis of fork rate was restricted to those forks that are positively derived from active replication origins. In this case, the length of green (IdU) tracks was measured only when included in 'green-red-green' tracks or in two proximal 'red-green' forks that are moving in opposite directions in the same fiber.

## **POLD3 immunoprecipitation followed by Mass Spectrometry**

Protein G-Dynabeads were washed twice in 50 mM Tris, pH 7.9, and 200 mM NaCl, incubated with specific antibodies in the presence of 1 mg/ml BSA for 1h at 4°C and washed 5 times in 50 mM Tris, pH 7.9, and 200 mM NaCl before the incubation with the extract. 500  $\mu$ g nuclear extract at 1 mg/ml in 50 mM Tris, pH 7.9, and 200 mM NaCl was centrifuged for 10 min at 20000 g at 4°C. The supernatant was incubated with Protein G-Dynabeads coated with the specific antibodies at 4°C overnight. The beads were washed 5 times with 50 mM Tris, pH 7.9, 200 mM NaCl and 0.05% Igepal CA630 (Sigma). Proteins were eluted in 8 M urea in 0.1 M triethylammonium bicarbonate TEAB (UA) and digested using the FASP method (Wisniewski et al. 2009) with some modifications. Briefly, samples were loaded onto centrifugal devices Microcon-30 (Merck Millipore). Filters were washed with UA and proteins were alkylated using 50 mM iodoacetamide for 20 min in the dark. Proteins were digested during 5 h with endoproteinase Lys-C (Wako). Finally, trypsin (Promega, Madison, WI) was added and samples were subjected to an overnight digestion. Reaction was quenched by acidification (final TFA concentration of 0.5%).



Peptides were desalted with home-made Stage-tips using Poros R3 resin, dried down in a speed-vac and re-suspended in 22  $\mu$ L of 0.1% of formic acid.

NanoLC-MS/MS was performed using an LTQ-Orbitrap Velos (Thermo Scientific) coupled online to a nanoLC Ultra system (Eksigent), equipped with a nanoelectrospray ion source (Proxeon Biosystems). Samples (10  $\mu$ L) were loaded onto a reversed-phase C18, 5  $\mu$ m, 0.1 x 20 mm trapping column (NanoSeparations) and washed for 15 min at 2.5  $\mu$ l/min with 0.1% FA. The peptides were eluted at a flow rate of 300 nl/min onto a home-made analytical column packed with ReproSil-Pur C18-AQ beads, 3  $\mu$ m, 75  $\mu$ m x 50 cm, heated to 45 °C. Solvent A was 4% ACN in 0.1% FA and Solvent B acetonitrile in 0.1% FA. The following gradient was used: 0–2 min 2% B, 2–103 min 6–35% B, 103–103.5 min 35–98% B, 103.5–113.5 min 98% B, 114–120 min 2% B. The LTQ Orbitrap Velos was operated in a data dependent mode. The spray voltage was set to 1.8 kV and the temperature of the heated capillary was set to 325°C. The MS survey scan was performed in the FT analyzer scanning a window between 350 and 1500  $m/z$ . The resolution was set to 60 000 FWHM at  $m/z$  400. The  $m/z$  values triggering MS/MS with a repeat count of 1 were put on an exclusion list for 60 s. The minimum MS signal for triggering MS/MS was set to 800 counts. In all cases, one microscan was recorded. The 15 most abundant isotope patterns with charge  $\geq 2$  from the survey scan were sequentially isolated with an isolation window of 1.5  $m/z$  and fragmented in the linear ion trap (LTQ) by collision induced dissociation (CID) using a normalized collision energy of 35%. The Q value to 0.25 and an activation time to 10 ms. The maximum ion injection times for the survey scan and the MS/MS scans were 500 ms and 100 ms respectively and the ion target values were set to 1e6 and 5000, respectively for each scan mode.

Raw data was processed using Proteome Discoverer 1.4 (Thermo) with Sequest HT as the search engine against a UniprotKB/TrEMBL database of *Mus musculus* (43,937 sequences) supplemented with frequently observed contaminants (397 sequences). Carbamidomethylation of cysteine was set as fixed modification and oxidation of methionine as variable modification. Precursor mass tolerance was 20 ppm and fragment mass tolerance was 0.5 Da. Peptide Spectrum Matches (PSMs) were filtered using Percolator (v2.04) with a FDR of 1%.

**ANTIBODIES USED IN THIS WORK:**

| <b>Antibody</b>   | <b>Use</b>          | <b>Dilution</b>                 | <b>Reference</b>       |
|-------------------|---------------------|---------------------------------|------------------------|
| CHK1              | Western blot        | 1/500                           | Novocastra, NCL-Chk1   |
| CHK1-S345P        | Western blot        | 1/500                           | Cell Signaling, #2348S |
| H2A               | Western blot        | 1/1000                          | Cell Signaling, #3636  |
| $\gamma$ H2AX     | Western blot        | 1/1000                          | Millipore 05-636       |
| CDK2              | Western blot        | 1/2000                          | Santa Cruz, M2, sc-163 |
| POLD1             | Western blot        | 1/200                           | Santa Cruz, sc373731   |
| POLD2             | Western blot        | 1/1000                          | Sigma, HPA026745       |
| POLD3             | Western blot        | 1/1000                          | Sigma, HPA039627       |
| POLE              | Western blot        | 1/1000                          | GeneTex, GTX113806     |
| $\alpha$ -Tubulin | Western blot        | 1/50000                         | Sigma, T9026           |
| $\beta$ -Actin    | Western blot        | 1/50000                         | Sigma, A5441           |
| CldU              | Fiber analysis      | 1/100                           | Abcam ab6326           |
| IdU               | Fiber analysis      | 1/150                           | BD Biosciences 347580  |
| ssDNA             | Fiber analysis      | 1/200                           | Millipore MAB3034      |
| POLD3             | Immunoprecipitation | 3.5 $\mu$ g/500 $\mu$ g extract | Sigma, HPA039627       |
| $\gamma$ H2AX     | IHC                 | 1/1000                          | Millipore 05-636       |

## SUPPLEMENTAL REFERENCES:

- Jackson DA, Pombo A. 1998. Replicon clusters are stable units of chromosome structure: evidence that nuclear organization contributes to the efficient activation and propagation of S phase in human cells. *J Cell Biol* **140**: 1285-1295.
- Lakso M, Pichel JG, Gorman JR, Sauer B, Okamoto Y, Lee E, Alt FW, Westphal H. 1996. Efficient in vivo manipulation of mouse genomic sequences at the zygote stage. *Proc Natl Acad Sci U S A* **93**: 5860-5865.
- Mouron S, Rodriguez-Acebes S, Martinez-Jimenez MI, Garcia-Gomez S, Chocron S, Blanco L, Mendez J. 2013. Repriming of DNA synthesis at stalled replication forks by human PrimPol. *Nat Struct Mol Biol* **20**: 1383-1389.
- Rickert RC, Roes J, Rajewsky K. 1997. B lymphocyte-specific, Cre-mediated mutagenesis in mice. *Nucleic Acids Res* **25**: 1317-1318.
- Rodriguez CI, Buchholz F, Galloway J, Sequerra R, Kasper J, Ayala R, Stewart AF, Dymecki SM. 2000. High-efficiency deleter mice show that FLP<sub>e</sub> is an alternative to Cre-loxP. *Nat Genet* **25**: 139-140.
- Ruzankina Y, Pinzon-Guzman C, Asare A, Ong T, Pontano L, Cotsarelis G, Zediak VP, Velez M, Bhandoola A, Brown EJ. 2007. Deletion of the developmentally essential gene ATR in adult mice leads to age-related phenotypes and stem cell loss. *Cell Stem Cell* **1**: 113-126.
- Toledo LI, Murga M, Zur R, Soria R, Rodriguez A, Martinez S, Oyarzabal J, Pastor J, Bischoff JR, Fernandez-Capetillo O. 2011. A cell-based screen identifies ATR inhibitors with synthetic lethal properties for cancer-associated mutations. *Nat Struct Mol Biol* **18**: 721-727.
- Wisniewsky JR, Zougman A, Nagaraj N, Mann M. 2009. Universal sample preparation method for proteome analysis. *Nat Methods* **6**: 359-362.
